# Supplementary material for: Global high-resolution fire-sourced PM 2.5 concentrations for 2000–2023
Source: Copernicus journal article supplement (doi:10.5194/essd-17-3741-2025), 2025-08-04
Supplement: Supplementary file 1 [file essd-17-3741-2025-supplement.pdf]

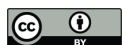

*Supplement of*

## **Global high-resolution fire-sourced PM<sub>2.5</sub> concentrations for 2000–2023**

**Yonghang Hu et al.**

*Correspondence to:* Xu Yue (yuexu@nuist.edu.cn)

The copyright of individual parts of the supplement might differ from the article licence.

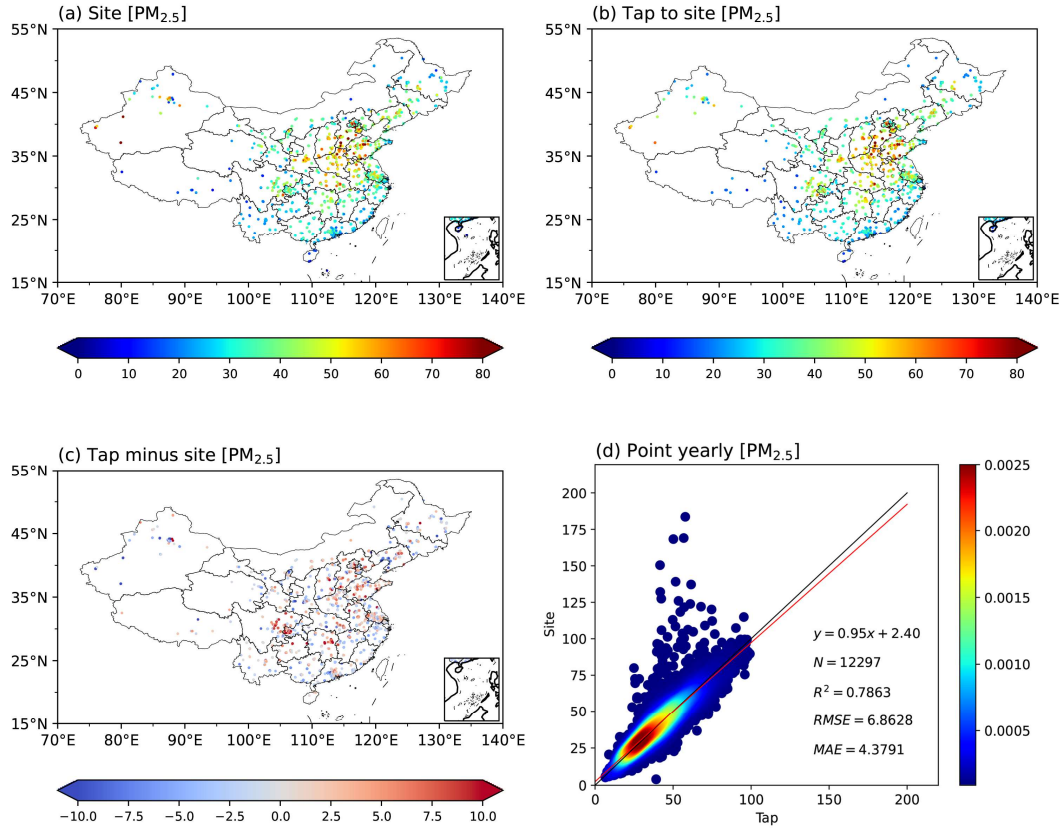

**Figure S1.** Comparison of observed and interpolated  $\text{PM}_{2.5}$  concentrations ( $[\text{PM}_{2.5}]$ ) in China from 2015 to 2022. Panel (a) displays annual mean  $[\text{PM}_{2.5}]$  ( $\mu\text{g m}^{-3}$ ) at 1822 monitoring sites. Panel (b) shows interpolated annual mean  $[\text{PM}_{2.5}]$  from Tracking Air Pollution (TAP) dataset. Panel (c) presents the difference between interpolated and observed values. Panel (d) compares annual mean  $[\text{PM}_{2.5}]$  at each site with observations, with colors indicating data frequency. Validation metrics, including sample size ( $N$ ), regression equation, determination coefficient ( $R^2$ ), root-mean-square error (RMSE), and mean absolute error (MAE) are also provided.

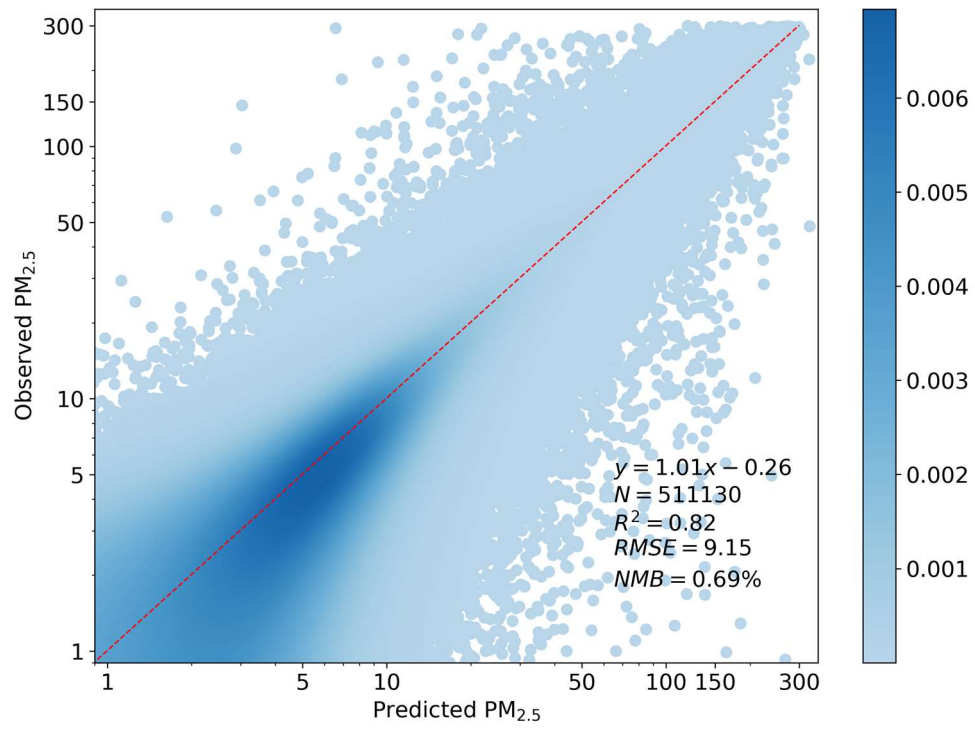

**Figure S2.** Same as Fig. 1b, but for GEOS-Chem simulations using the QFED inventory.

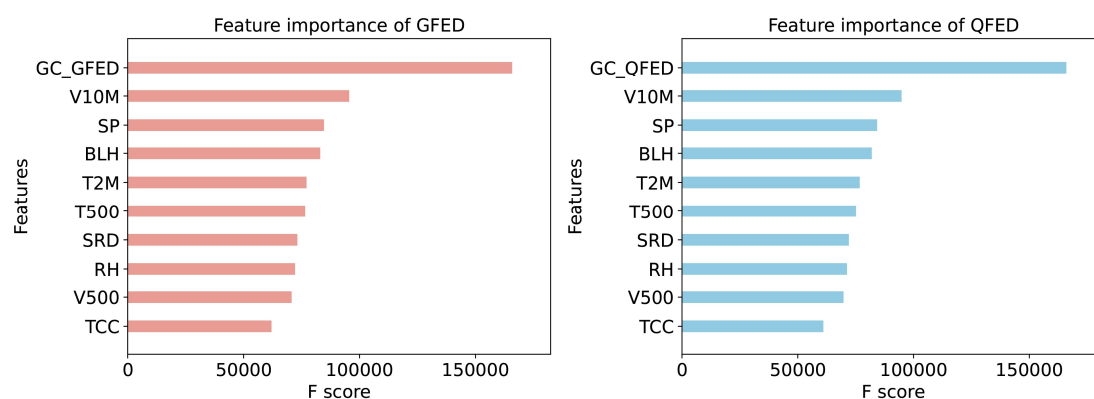

**Figure S3.** Top 10 important features measured by F-score for the machine learning model, which was trained using GEOS-Chem simulations with fire emissions from (a) GFED and (b) QFED inventories in 2022, respectively. The full name of each feature is shown in Table S1.

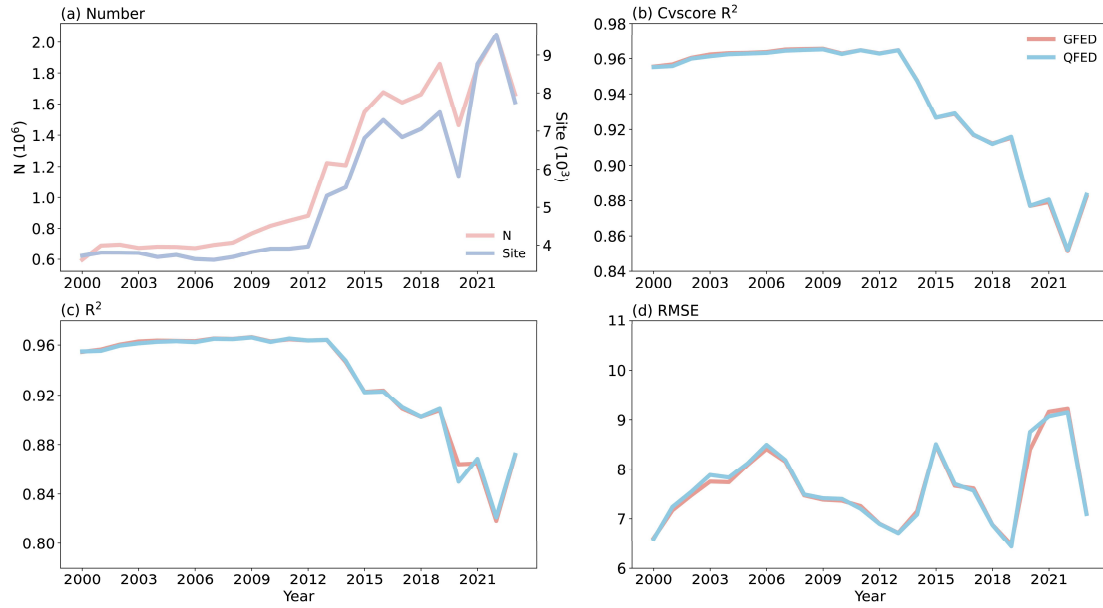

**Figure S4.** Statistical metrics of estimated  $[PM_{2.5}]$  from 2000 to 2023. Panel (a) shows the total number of sites and samples (N) used for machine learning training. Panel (b) presents the 10-fold cross-validation  $R^2$  for each year, comparing estimations using different fire emission inventories, including GFED and QFED. Panels (c) and (d) display the year-to-year  $R^2$  and RMSE between observed and estimated  $[PM_{2.5}]$  using these different fire emission inventories for independent validation samples.

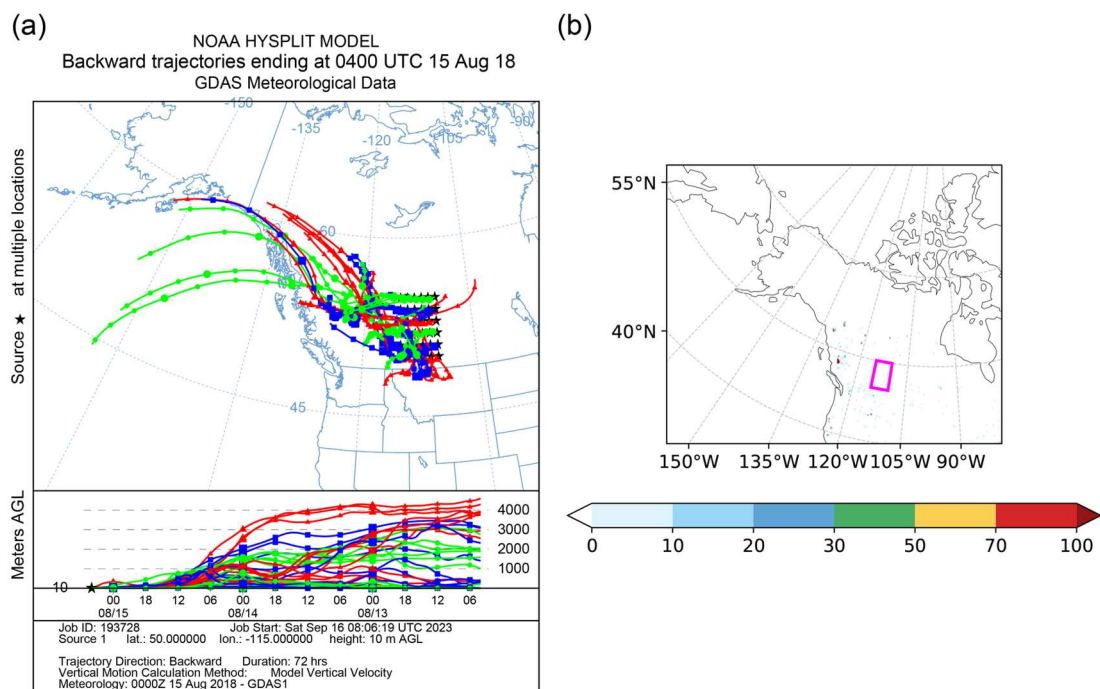

**Figure S5.** The 72-hour backward trajectories of Canadian sites ending on August 15<sup>th</sup>, 2018, generated using the NOAA HYSPLIT Trajectory Model. The horizontal and vertical trajectories are shown in (a) and the fire emissions of GFED inventory (units:  $\text{g m}^{-2} \text{yr}^{-1}$ ) averaged for August 13-15, 2018 are shown in (b). The pink box represents the range of sites in Canada.

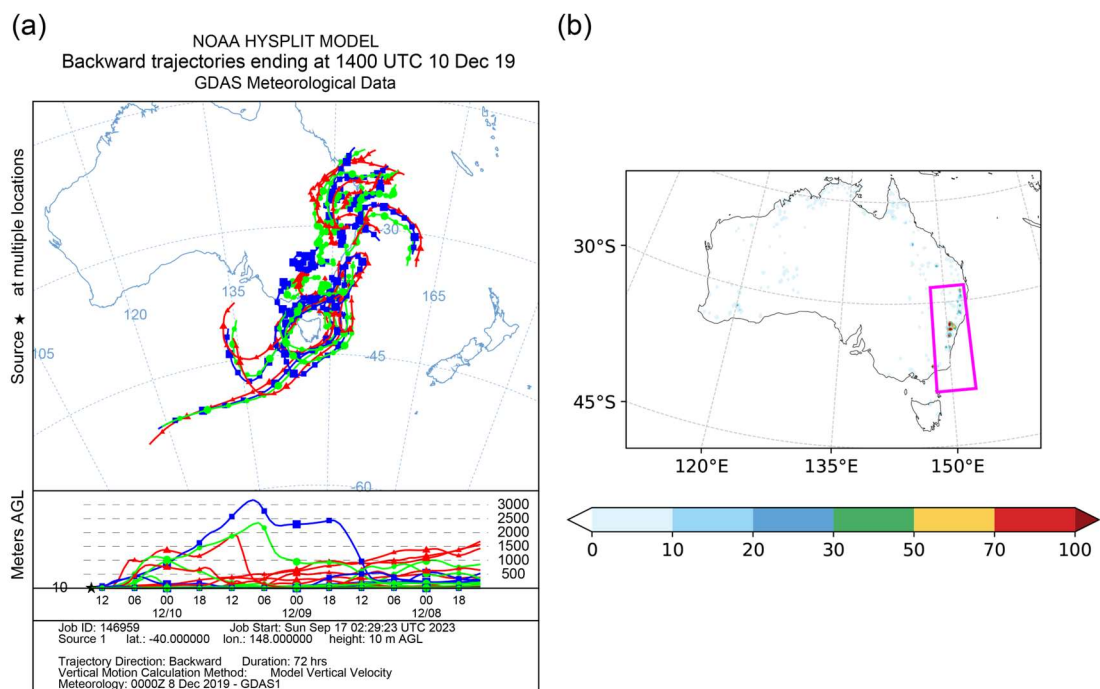

**Figure S6.** The same as Fig. S5 but for the backward trajectories of Australian sites ending on December 10<sup>th</sup>, 2019.

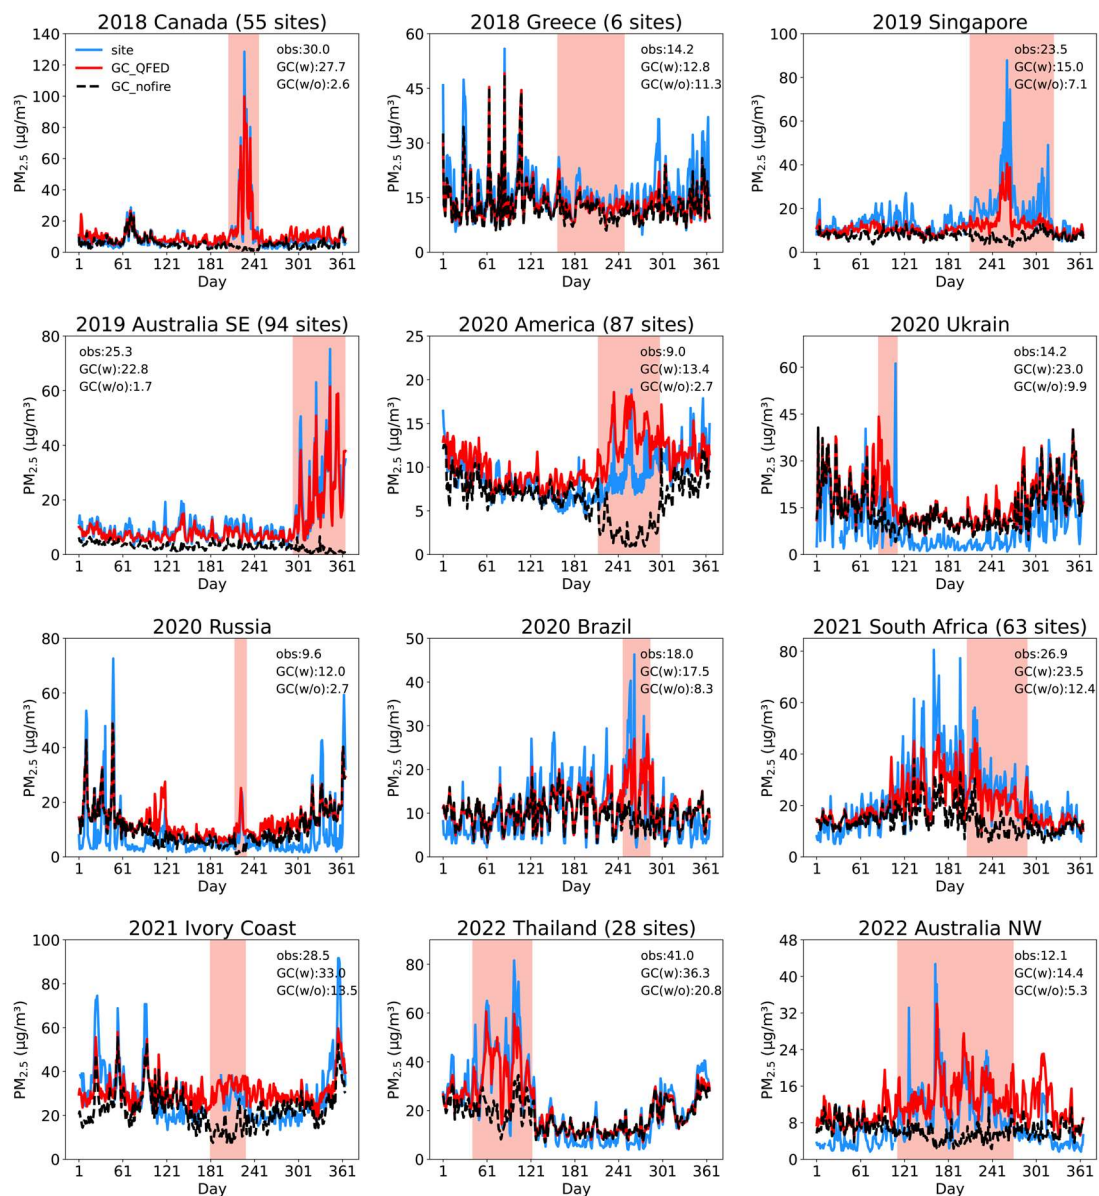

**Figure S7.** The same as Fig. 3 but the estimated  $[PM_{2.5}]$  is derived using QFED fire emission inventory.

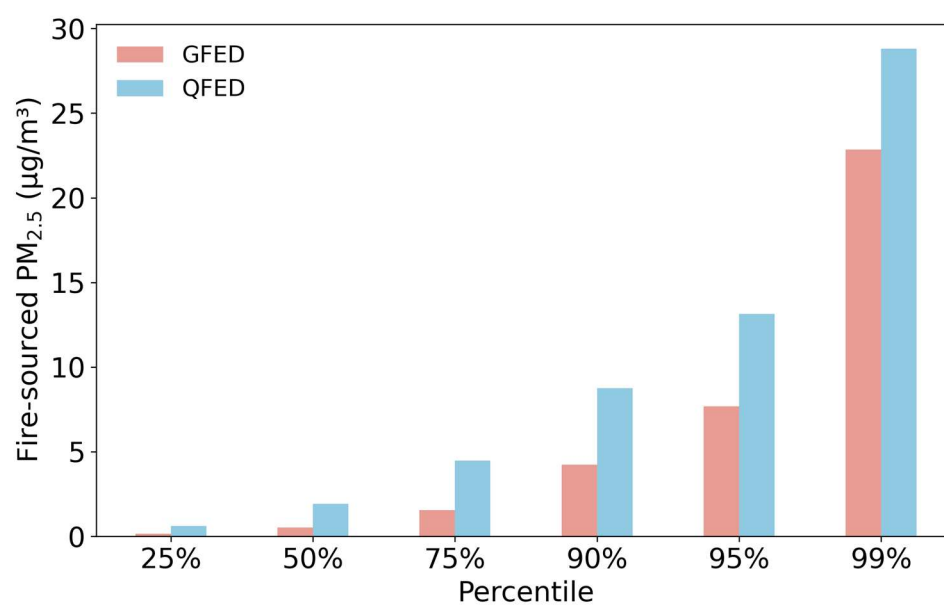

**Figure S8.** Comparison of daily fire-sourced  $[\text{PM}_{2.5}]$  at different percentiles between simulations with GFED and QFED inventories.

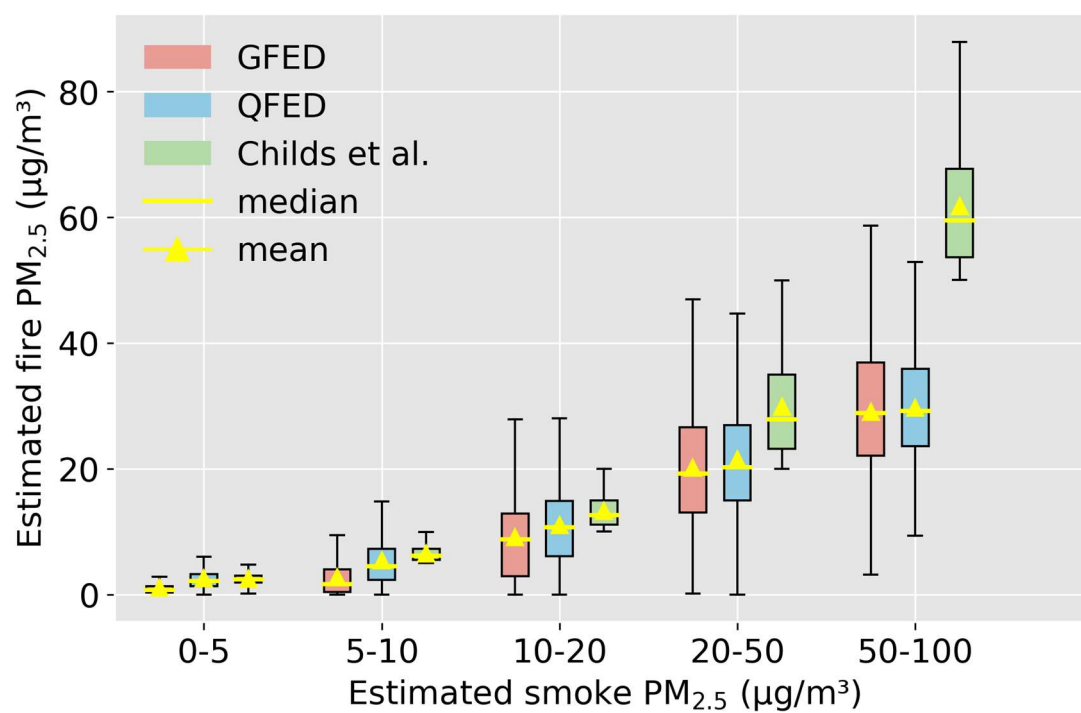

**Figure S9.** Boxplot of estimated GFED and QFED fire PM<sub>2.5</sub> v.s. Childs et al. (2022) estimated smoke PM<sub>2.5</sub> under various levels.

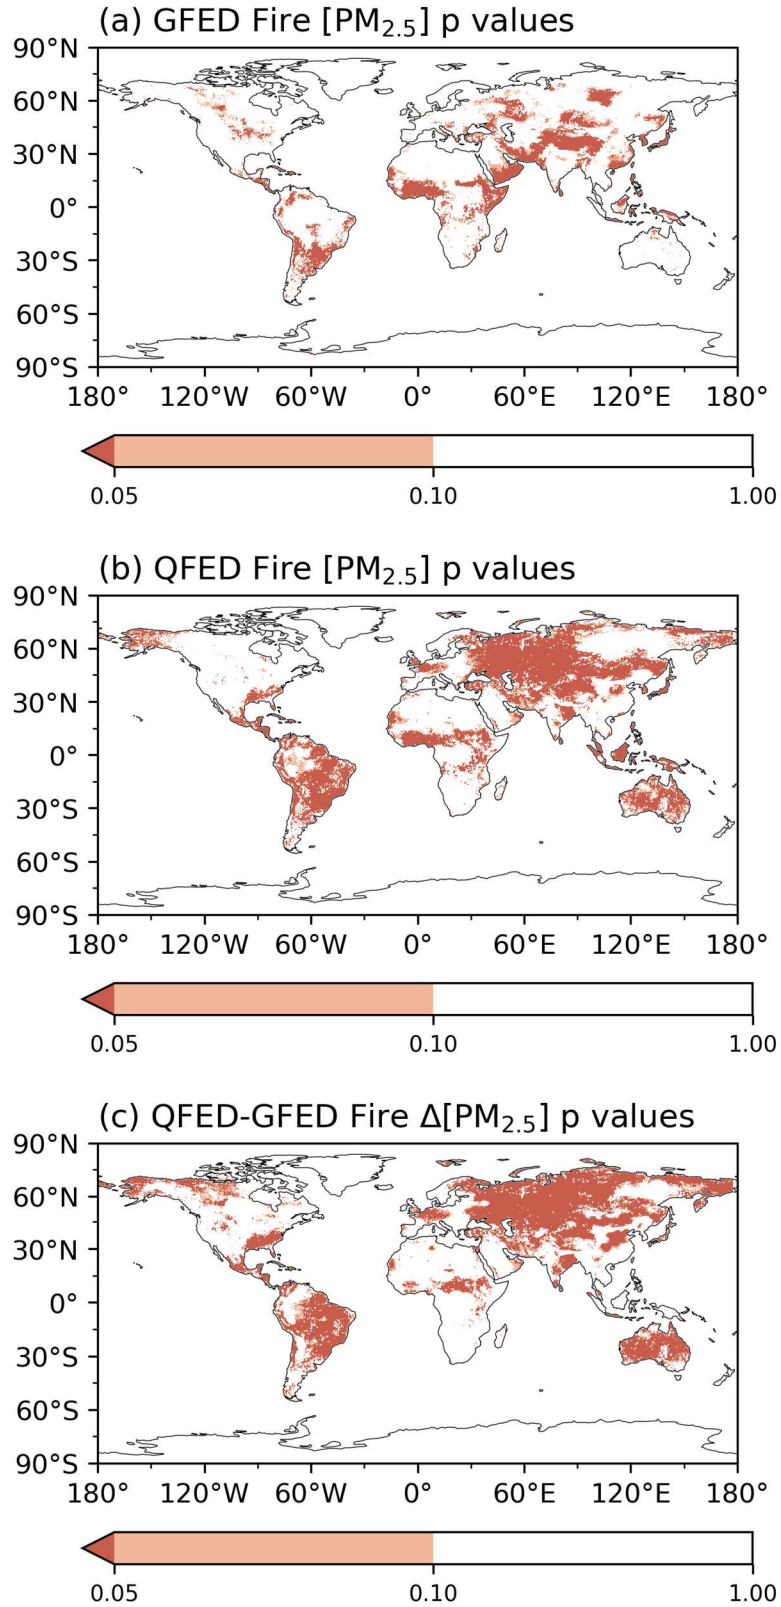

**Figure S10.** The  $p$  values of long-term (a) trends in fire [PM<sub>2.5</sub>] derived using the GFED inventory for 2000-2023. Panels (b) and (c) display the same information as (a), but for fire [PM<sub>2.5</sub>] from QFED inventory and differences between QFED and GFED inventories.

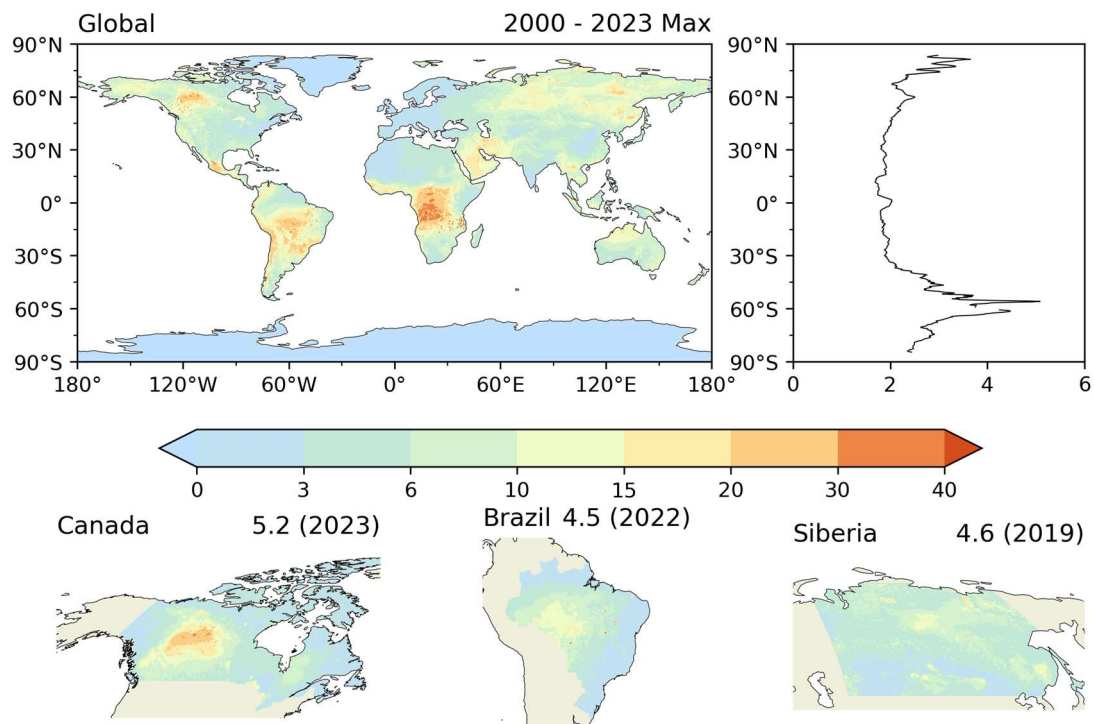

**Figure S11.** The same as Fig. 7 but with fire emissions from the QFED inventory.

**Table S1** Summary of the input for machine learning model

| Variables  | Descriptions                                                     |
|------------|------------------------------------------------------------------|
| GC_GFED    | Simulated [PM <sub>2.5</sub> ] by GEOS-Chem using GFED emissions |
| GC_QFED    | Simulated [PM <sub>2.5</sub> ] by GEOS-Chem using QFED emissions |
| BLH        | Boundary layer height                                            |
| Pc         | Convective precipitation                                         |
| Pls        | Large scale precipitation                                        |
| Pt         | Total precipitation                                              |
| T2M        | 2m temperature                                                   |
| T2X        | Maximum 2m temperature since previous post processing            |
| T2N        | Minimum 2m temperature since previous post processing            |
| RH         | Relative humidity                                                |
| SP         | Surface pressure                                                 |
| SRD        | Surface solar radiation downwards                                |
| T500       | Temperature 500hPa                                               |
| T850       | Temperature 850hPa                                               |
| TCC        | Total cloud cover                                                |
| V10M       | Wind speed at 10m                                                |
| V500       | Wind speed at 500hpa                                             |
| V850       | Wind speed at 850hpa                                             |
| F_Water    | The cover fraction of Water                                      |
| F_ENF      | The cover fraction of Evergreen Needleleaf Forest                |
| F_EBF      | The cover fraction of Evergreen Broadleaf Forest                 |
| F_DNF      | The cover fraction of Deciduous Needleleaf Forest                |
| F_DBF      | The cover fraction of Deciduous Broadleaf Forest                 |
| F_Mforest  | The cover fraction of Mixed Forests                              |
| F_Cshrub   | The cover fraction of Closed Shrubland                           |
| F_Oshrub   | The cover fraction of Open Shrubland                             |
| F_Wsavanna | The cover fraction of Woody Savannas                             |
| F_savanna  | The cover fraction of Savannas                                   |
| F_grass    | The cover fraction of Grasslands                                 |
| F_Pwetland | The cover fraction of Permanent Wetlands                         |
| F_crop     | The cover fraction of Croplands                                  |
| F_urban    | The cover fraction of Urban and Built-up                         |
| F_CVM      | The cover fraction of Cropland/Natural Vegetation Mosaic         |
| F_snow     | The cover fraction of Snow and Ice                               |
| F_barren   | The cover fraction of Barren or Sparsely Vegetated               |

**Table S2** Spatiotemporal information of wildfire episodes

| Event             | Region             | Time            |
|-------------------|--------------------|-----------------|
| 2018 Canada       | British Columbia   | 2018.7-2018.8   |
| 2018 Greece       | Athens             | 2018.6-2018.8   |
| 2019 Singapore    | Sumatra            | 2019.8-2019.11  |
| 2019 Australia SE | New South Wales    | 2019.10-2019.12 |
| 2020 Ukrain       | Chernobyl          | 2020.3-2020.4   |
| 2020 Russia       | Siberia            | 2020.8          |
| 2020 Brazil       | Sao Paulo          | 2020.9-2020.10  |
| 2021 Ivory Coast  | Yamoussoukro       | 2021.7-2021.9   |
| 2021 South Africa | Limpopo            | 2021.7-2021.10  |
| 2022 Australia NW | Northern Territory | 2022.4-2022.9   |
| 2022 Thailand     | Lampang            | 2022.4-2022.5   |
